# Supplementary material
Source: publisher site journal article supplement (https://www.dovepress.com/article/331562)
Supplement: Supplementary file 1 [file get_supplementary_file.php]

# Supplementary Tables

# Repeated non-animal stabilized hyaluronic acid (Durolane) injections give sustained benefit in hip and knee osteoarthritis: A 6-year cohort study with 623 consecutive patients.

Georgia Carney1,2, Andrew Harrison3, Jane Fitzpatrick1,2,4

1Joint Health Institute, Melbourne, Victoria, Australia

2The University of Melbourne, Faculty of Medicine, Dentistry and Health Sciences, Parkville, Victoria, Australia

2Bioventus International, Taurusavenue 31, 2131 LS, Hoofddorp, Netherlands

3Australasian College of Sport and Exercise Physicians, Melbourne, Victoria, Australia

**Table A Average time (overall) joints returned for a HA injection, in days, stratified by group.**

| Group | Joints, n | Mean ± SD | 95% CI | df | F | p-value |
| --- | --- | --- | --- | --- | --- | --- |
| Joint Injected |  |  |  |  |  |  |
| Knee | 151 | 452.2 ± 290.4 | 407.8 – 496.7 | 2, 257 | 0.99 | 0.3747 |
| Hip | 105 | 409.3 ± 261.3 | 356.0 – 462.6 |  |  |  |
| Shoulder | 4 | 337 ± 111.3 | 63.8 – 610.2 |  |  |  |
|  |  |  |  |  |  |  |
| Age |  |  |  |  |  |  |
| <40 | 10 | 392.8 ± 134.3 | 220.7 – 564.9 | 4, 255 | 1.52 | 0.1980 |
| 40-49 | 28 | 444.8 ± 301.9 | 341.9 – 547.6 |  |  |  |
| 50-59 | 114 | 455.4 ± 322.8 | 404.4 – 506.3 |  |  |  |
| 60-69 | 76 | 446.2 ± 229.6 | 383.8 – 508.7 |  |  |  |
| >70 | 32 | 325.1 ± 189.7 | 228.9 – 421.3 |  |  |  |
|  |  |  |  |  |  |  |
| Gender |  |  |  |  |  |  |
| Male | 126 | 417.2 ± 280.0 | 368.5 – 465.9 | 1, 258 | 0.8 | 0.3718 |
| Female | 134 | 448.0 ± 275.2 | 400.8 – 495.3 |  |  |  |
|  |  |  |  |  |  |  |
| KL grade |  |  |  |  |  |  |
| 2 | 103 | 462.1 ± 285.9 | 408.8 – 515.5 | 2, 257 | 3.51 | 0.0314 |
| 3 | 93 | 455.2 ± 310.9 | 399.1 – 511.3 |  |  |  |
| 4 | 64 | 354.3 ± 185.8 | 286.7 – 421.9 |  |  |  |
| Number is n; standard deviation is SD; confidence interval is CI, and degrees of freedom is df. The values are expressed in days, unless indicated otherwise. | | | | | | |

**Table B-1** **Average time joints returned for a 3rd HA injection, in days, stratified by group**

| Group | Joints, n | Mean ± SD | df | F | p-value |
| --- | --- | --- | --- | --- | --- |
| Joint Injected |  |  |  |  |  |
| Knee | 35 | 420.0 ± 163.1 | 2, 55 | 0.83 | 0.4431 |
| Hip | 21 | 377.6 ± 172.6 |  |  |  |
| Shoulder | 2 | 298.5 ± 27.6 |  |  |  |
|  |  |  |  |  |  |
| Age |  |  |  |  |  |
| <40 | 3 | 411.6 ± 72.2 | 4, 53 | 0.46 | 0.7648 |
| 40-49 | 4 | 411.8 ± 275.9 |  |  |  |
| 50-59 | 27 | 406.0 ± 167.2 |  |  |  |
| 60-69 | 16 | 422.6 ± 160.3 |  |  |  |
| >70 | 8 | 327.8 ± 143.0 |  |  |  |
|  |  |  |  |  |  |
| Gender |  |  |  |  |  |
| Male | 28 | 427.6 ± 173.0 | 1, 56 | 1.47 | 0.2298 |
| Female | 30 | 375.2 ± 155.2 |  |  |  |
|  |  |  |  |  |  |
| KL grade |  |  |  |  |  |
| 2 | 23 | 387.8 ± 156.2 | 2, 55 | 0.48 | 0.6198 |
| 3 | 21 | 428.6 ± 177.1 |  |  |  |
| 4 | 14 | 379.2 ± 165.6 |  |  |  |
| Number is n; standard deviation is SD, and degrees of freedom is df. The values are expressed in days, unless indicated otherwise. | | | | | |

**Table B-2** **Average time joints returned for a 4th HA injection, in days, stratified by group**

| Group | Joints, n | Mean ± SD | df | F | p-value |
| --- | --- | --- | --- | --- | --- |
| Joint Injected |  |  |  |  |  |
| Knee | 18 | 405.5 ± 268.2 | 1, 25 | 0.80 | 0.3785 |
| Hip | 9 | 323.6 ± 61.3 |  |  |  |
| Shoulder | - | - |  |  |  |
|  |  |  |  |  |  |
| Age |  |  |  |  |  |
| <40 | 1 | 299 | 4, 22 | 0.73 | 0.5824 |
| 40-49 | 1 | 336 |  |  |  |
| 50-59 | 13 | 440.5 ± 269.9 |  |  |  |
| 60-69 | 8 | 367.8 ± 190.0 |  |  |  |
| >70 | 4 | 226.8 ± 71.3 |  |  |  |
|  |  |  |  |  |  |
| Gender |  |  |  |  |  |
| Male | 11 | 356.7 ± 284.0 | 1, 25 | 0.17 | 0.6869 |
| Female | 16 | 392.9 ± 181.7 |  |  |  |
|  |  |  |  |  |  |
| KL grade |  |  |  |  |  |
| 2 | 14 | 389.2 ± 203.5 | 2, 24 | 0.40 | 0.6722 |
| 3 | 8 | 409.4 ± 309.8 |  |  |  |
| 4 | 5 | 297.4 ± 101.5 |  |  |  |
| Number is n; standard deviation is SD, and degrees of freedom is df. The values are expressed in days, unless indicated otherwise. | | | | | |

**Table B-3** **Average time joints returned for a 5th HA injection, in days, stratified by group**

| Group | Joints, n | Mean ± SD | df | F | p-value |
| --- | --- | --- | --- | --- | --- |
| Joint Injected |  |  |  |  |  |
| Knee | 5 | 342.2 ± 116.5 | 1, 5 | 3.47 | 0.1214 |
| Hip | 2 | 608 ± 333.8 |  |  |  |
| Shoulder | - | - |  |  |  |
|  |  |  |  |  |  |
| Age |  |  |  |  |  |
| <40 | - | - | 1, 5 | 0.68 | 0.4469 |
| 40-49 | - | - |  |  |  |
| 50-59 | 4 | 345.3 ± 123.1 |  |  |  |
| 60-69 | 3 | 485.3 ± 317.5 |  |  |  |
| >70 | - | - |  |  |  |
|  |  |  |  |  |  |
| Gender |  |  |  |  |  |
| Male | 4 | 317.8 ± 133.5 | 1, 5 | 1.71 | 0.2480 |
| Female | 3 | 522 ± 279.1 |  |  |  |
|  |  |  |  |  |  |
| KL grade |  |  |  |  |  |
| 2 | 3 | 404 ± 75.3 | 2, 4 | 0.71 | 0.5438 |
| 3 | 2 | 270.5 ± 115.3 |  |  |  |
| 4 | 2 | 542 ± 427.1 |  |  |  |
| Number is n; standard deviation is SD, and degrees of freedom is df. The values are expressed in days, unless indicated otherwise. | | | | | |

**Table B-4** **Average time joints returned for a 6th HA injection, in days, stratified by group**

| Group | Joints, n | Mean ± SD | df | F | p-value |
| --- | --- | --- | --- | --- | --- |
| Joint Injected |  |  |  |  |  |
| Knee | 5 | 268.4 ± 104.4 | 0, 4 | - | - |
| Hip | - | - |  |  |  |
| Shoulder | - | - |  |  |  |
|  |  |  |  |  |  |
| Age |  |  |  |  |  |
| <40 | - | - | 1, 3 | 2.61 | 0.2046 |
| 40-49 | - | - |  |  |  |
| 50-59 | 4 | 300.3 ± 88.2 |  |  |  |
| 60-69 | 1 | 141 |  |  |  |
| >70 | - | - |  |  |  |
|  |  |  |  |  |  |
| Gender |  |  |  |  |  |
| Male | 4 | 265.5 ± 120.3 | 1,3 | 0.01 | 0.9210 |
| Female | 1 | 280 |  |  |  |
|  |  |  |  |  |  |
| KL grade |  |  |  |  |  |
| 2 | 2 | 343 ± 89.1 | 2, 2 | 1.72 | 0.3670 |
| 3 | 2 | 257.5 ± 89.8 |  |  |  |
| 4 | 1 | 141 |  |  |  |
| Number is n; standard deviation is SD, and degrees of freedom is df. The values are expressed in days, unless indicated otherwise. | | | | | |

**Table B-5** **Average time joints returned for a 7th HA injection, in days, stratified by group**

| Group | Joints, n | Mean ± SD | df | F | p-value |
| --- | --- | --- | --- | --- | --- |
| Joint Injected |  |  |  |  |  |
| Knee | 4 | 289.8 ± 99.4 | 0, 3 | - | - |
| Hip | - | - |  |  |  |
| Shoulder | - | - |  |  |  |
|  |  |  |  |  |  |
| Age |  |  |  |  |  |
| <40 | - |  | 1, 2 | 0.19 | 0.7065 |
| 40-49 | - |  |  |  |  |
| 50-59 | 3 | 304.3 ± 116.3 |  |  |  |
| 60-69 | 1 | 246 |  |  |  |
| >70 |  |  |  |  |  |
|  |  |  |  |  |  |
| Gender |  |  |  |  |  |
| Male | 4 | 289.8 ± 99.4 | 0, 3 | - | - |
| Female | - | 280 |  |  |  |
|  |  |  |  |  |  |
| KL grade |  |  |  |  |  |
| 2 | 1 | 435 | 2, 1 | 9.66 | 0.2219 |
| 3 | 2 | 239 ± 38.2 |  |  |  |
| 4 | 1 | 246 |  |  |  |
| Number is n; standard deviation is SD, and degrees of freedom is df. The values are expressed in days, unless indicated otherwise. | | | | | |

**Table B-6** **Average time joints returned for an 8th HA injection, in days, stratified by group**

| Group | Joints, n | Mean ± SD | df | F | p-value |
| --- | --- | --- | --- | --- | --- |
| Joint Injected |  |  |  |  |  |
| Knee | 2 | 272.5 ± 33.2 | 0, 1 | - | - |
| Hip | - | - |  |  |  |
| Shoulder | - | - |  |  |  |
|  |  |  |  |  |  |
| Age |  |  |  |  |  |
| <40 | - |  | 1, 0 | - | - |
| 40-49 | - |  |  |  |  |
| 50-59 | 1 | 249 |  |  |  |
| 60-69 | 1 | 296 |  |  |  |
| >70 | - |  |  |  |  |
|  |  |  |  |  |  |
| Gender |  |  |  |  |  |
| Male | 2 | 272.5 ± 33.2 | 0, 1 | - | - |
| Female | - |  |  |  |  |
|  |  |  |  |  |  |
| KL grade |  |  |  |  |  |
| 2 | - | - | 1, 0 | - | - |
| 3 | 1 | 249 |  |  |  |
| 4 | 1 | 296 |  |  |  |
| Number is n; standard deviation is SD, and degrees of freedom is df. The values are expressed in days, unless indicated otherwise. | | | | | |
